# Supplementary material for: A highly sensitive ppb-level H2S gas sensor based on fluorophenoxy-substituted phthalocyanine cobalt/rGO hybrids at room temperature
Source: Royal Society of Chemistry journal article supplement (doi:10.1039/d0ra08832c), 2021-01-01
Supplement: d0ra08832c1.pdf [file d0ra08832c1.pdf]

# Highly sensitive ppb-level H<sub>2</sub>S gas sensor based on fluorophenoxy-substituted phthalocyanine cobalt/rGO hybrids at room temperature

Bin Wang,<sup>\*a</sup> Xiaolin Wang,<sup>b</sup> ZhiJiang Guo,<sup>a</sup> Shijie Gai,<sup>a</sup> Yiqun Wu,<sup>ac</sup>

<sup>a</sup>Key Laboratory of Functional Inorganic Material Chemistry, Ministry of Education,  
School of Chemistry and Materials Science, Heilongjiang University, Harbin 150080, P.  
R. China. E-mail: wangbin@hlju.edu.cn.

<sup>b</sup>School of Material and Chemical Engineering, Heilongjiang Institute of Technology,  
Harbin 150050, P. R. China

<sup>c</sup>Shanghai Institute of Optics and Fine Mechanics, Chinese Academy of Sciences,  
Shanghai 201800, P. R. China.

Tel.: +86 451 86609121

Fax: +86 451 86673647

## 1. Experimental detail

### 1.1 Materials

All chemicals were analytical grade and commercially available and used without further purification. 3-nitrophthalonitrile and 4-nitrophthalonitrile was purchased from Sigma-Aldrich Co. LLC., and was used without further purification. The synthesis scheme of Tetra- $\alpha$ -trifluoromethylphenoxyphthalocyanine cobalt (3-cF<sub>3</sub>poPcCo), and Tetra- $\beta$ -trifluoromethylphenoxyphthalocyanine cobalt (4-cF<sub>3</sub>poPcCo) is shown in scheme S1.

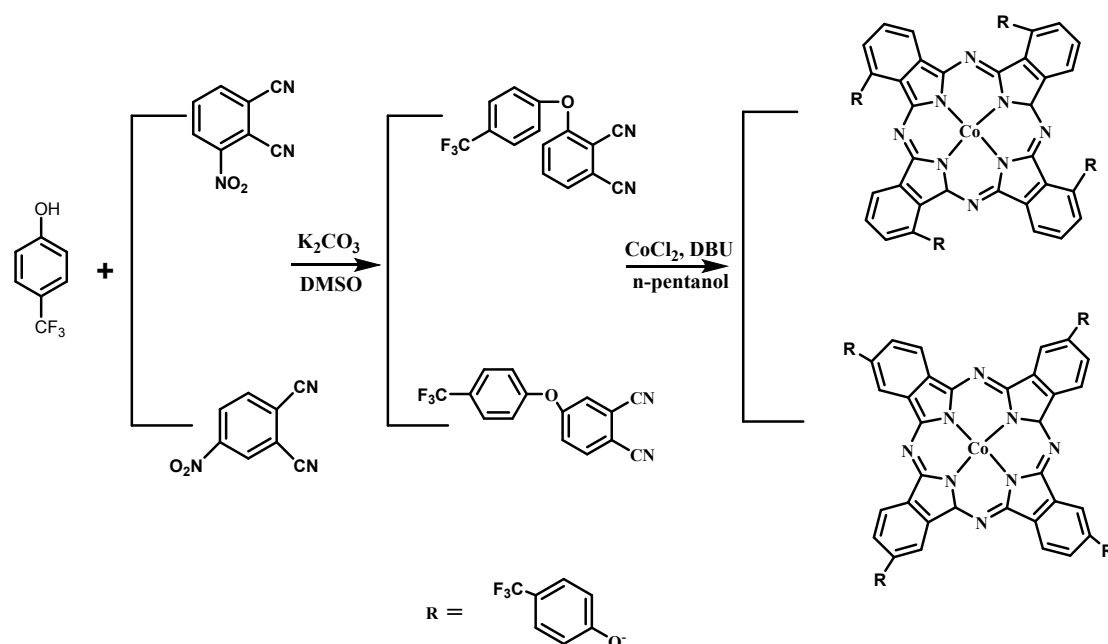

Scheme S1. Synthesis scheme of 3-cF<sub>3</sub>poPcCo and 4-cF<sub>3</sub>poPcCo.

### 1.2 The structure for gas sensors

Al<sub>2</sub>O<sub>3</sub> ceramic substrate is used for gas sensors. TaN, TiW, Ni and Au are sputtered on substrate as resistive layer, supporting layer, solder mask and conductor layer, respectively. Standard photolithography is then used to create Au interdigitated electrodes with 180  $\mu$ m electrode widths, and 50  $\mu$ m electrode gaps.

### 1.3 Characterization

Scanning electron microscopy (SEM) images were recorded with a Hitachi S-4800 field emission scanning electron microscope operating at 15 kV. Samples were drop-deposited onto the interdigitated electrodes and measured directly. UV/Vis absorption

spectra were recorded with an UV-2700 spectrometer (SHIMADZU, Japan). FT-IR spectra were recorded on a Spectrum two spectrometer (Perkin-Elmer).

#### 1.4 Synthesis of 3 - (4-trifluoromethylphenoxy) phthalonitrile

3-Nitrophthalonitrile (1.06 g, 5.78 mmol) was dissolved in DMSO (10 mL) under a nitrogen atmosphere, and then P-trifluoromethylphenol (1.41 g, 8.7 mmol) was added to the solution. After stirring for 1h, the mixture of anhydrous potassium carbonate ( $K_2CO_3$ ) (3g, 21.7mmol) was added one by one and stirred for 3 days in nitrogen atmosphere at room temperature. After the reaction, cool the reaction mixture to room temperature and pour it into about 200ml of ice water medium. After standing for about 24 hours, the white emulsion precipitates will be separated, and then the precipitates will be washed with a large amount of deionized water until the washing solution becomes neutral. Then the mixture of  $CHCl_3$ : MeOH (100/2) was used to separate pure white crystal products on silica gel column. The molecular weight of 3 - (4-trifluoromethylphenoxy) phthalonitrile analyzed by gas chromatography-mass spectrometry is shown in Fig. S1. Similarly, after the conversion of 3-phthalonitrile to 4-phthalonitrile. The same method can also be used to prepare 4 - (4-trifluoromethylphenoxy) phthalonitrile. The molecular weight of 4 - (4-trifluoromethylphenoxy) phthalonitrile analyzed by gas chromatography-mass spectrometry is shown in Fig. S2.

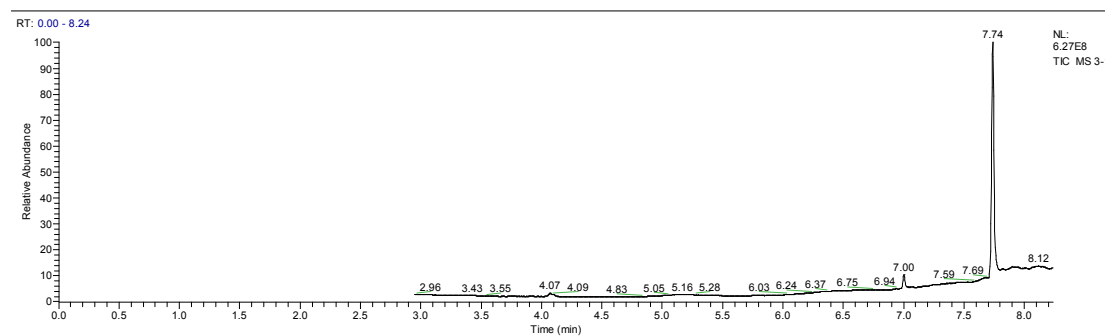

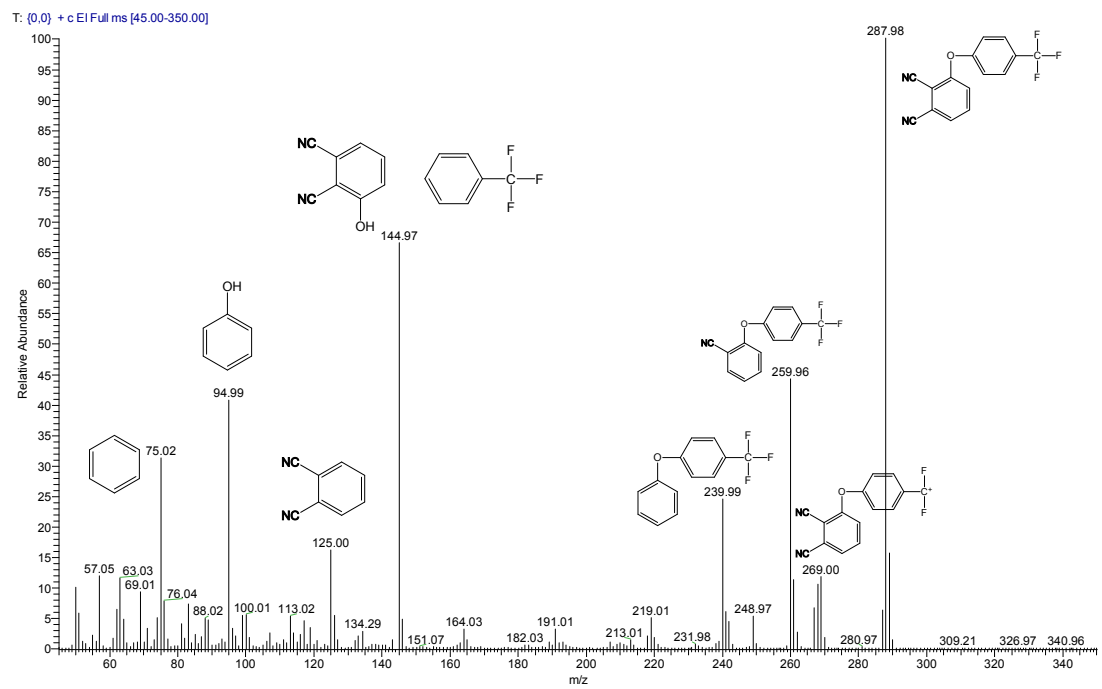

Fig.S1 GC-MS of 3-(4-trifluoromethylphenoxy) phthalonitrile.

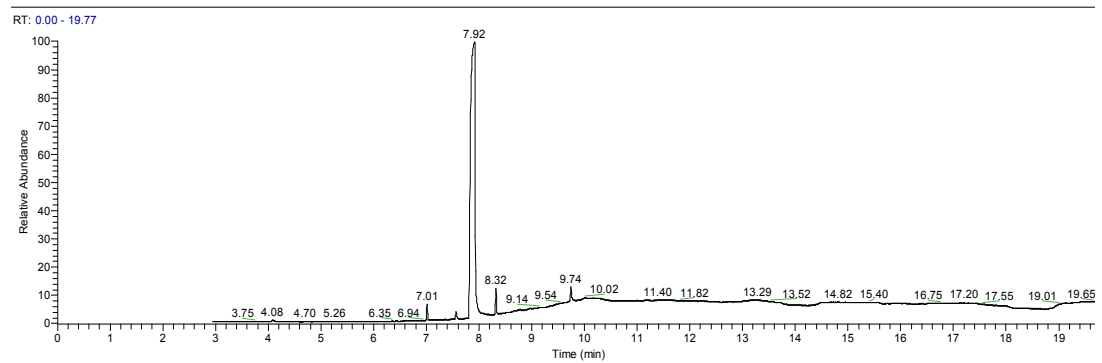

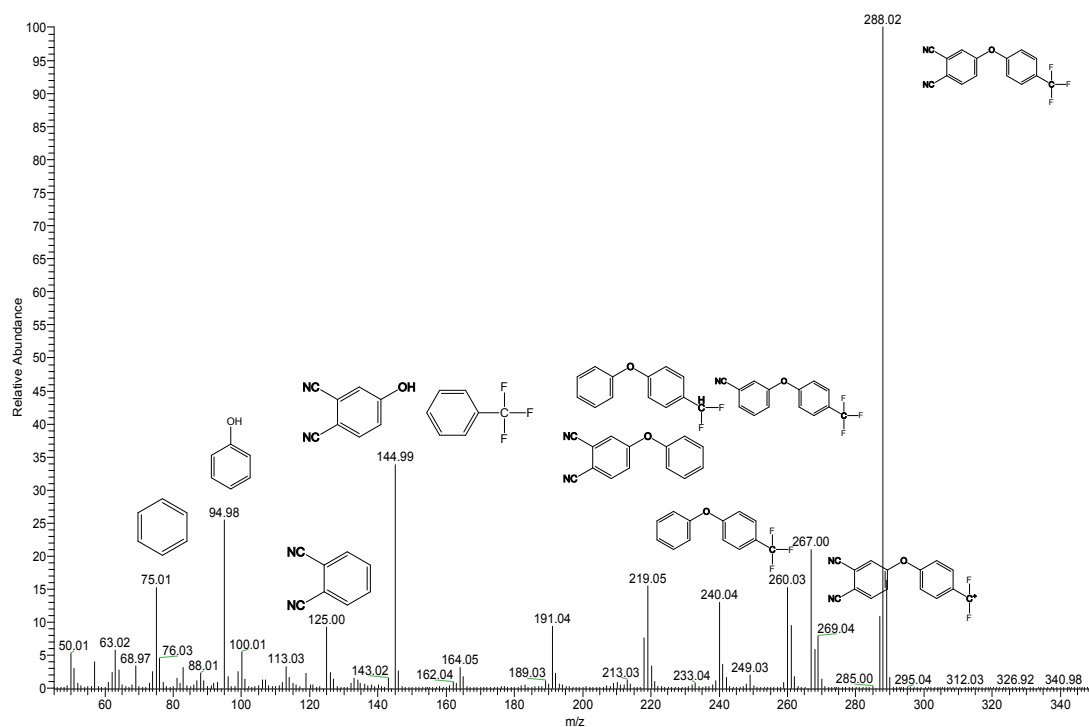

Fig.S2 GC-MS of 4-(4-trifluoromethylphenoxy)phthalonitrile

## 1.5 Synthesis of trifluoromethylphenoxyphthalocyanine cobalt

At room temperature, 3-(4-trifluoromethylphenoxy) phthalonitrile (1.06 g, 3.69 mmol), anhydrous cobalt chloride (II) (0.16 g, 1.23 mmol) and DBU (2.0 mL) were added to distilled n-pentanol (30 mL). The subsequent mixture was continuously stirred under reflux for 10 hours under a nitrogen atmosphere. After naturally cooling to about 20 °C, the precipitate was filtered, washed sequentially with methanol (50 mL) and acetone (50 mL). The pure crystal product 3-cF<sub>3</sub>poPcCo was obtained by chromatographic separation on silica gel column with acetone and dichloromethane (4:1) mixed solvent. Finally, the purple black crystal was obtained by drying in a vacuum oven at 50 °C. Similarly, after 3 - (4-trifluoromethylphenoxy) phthalonitrile is converted to 4 - (4-trifluoromethylphenoxy) phthalonitrile. The same method can also be used to prepare 4-cF<sub>3</sub>poPcCo.

## 2. Result and discussion

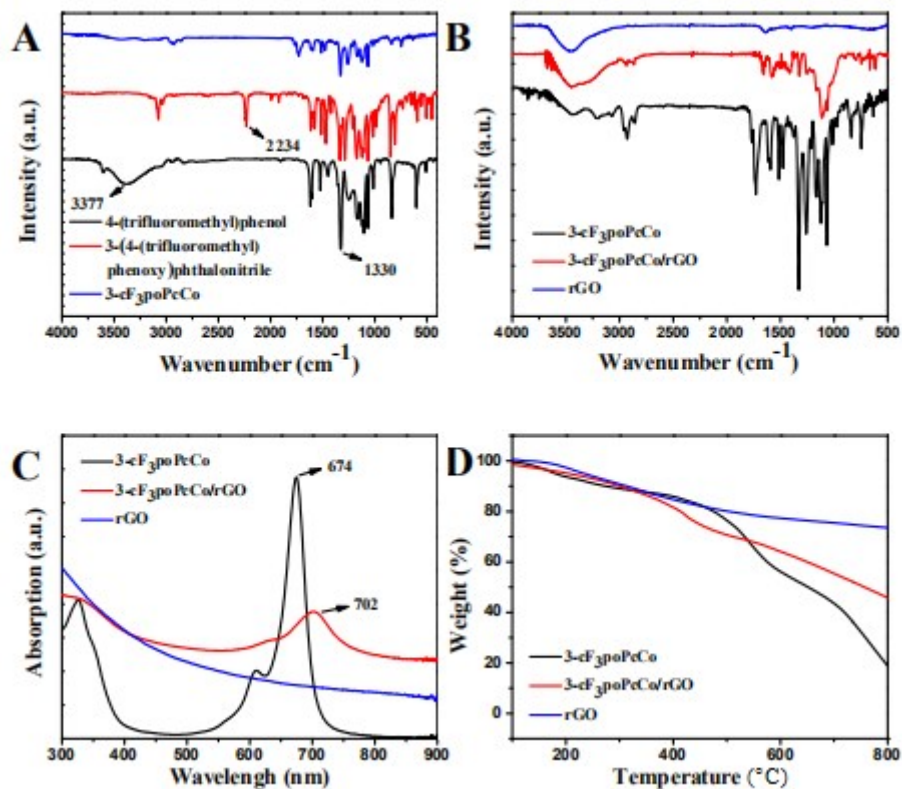

Fig.S3 (A) FT-IR spectra of 4-(trifluoromethyl) phenol, 3 - (4-trifluoromethylphenoxy) phthalonitrile and 3-cF<sub>3</sub>poPcCo hybrids; (B) FT-IR spectra of rGO, 3-cF<sub>3</sub>poPcCo and 3-cF<sub>3</sub>poPcCo/rGO hybrids; (C) UV-vis spectra of rGO, 3-cF<sub>3</sub>poPcCo and 3-cF<sub>3</sub>poPcCo/rGO hybrids in DMF; (D) TG profiles of rGO, 3-cF<sub>3</sub>poPcCo and 3-cF<sub>3</sub>poPcCo/rGO hybrid.

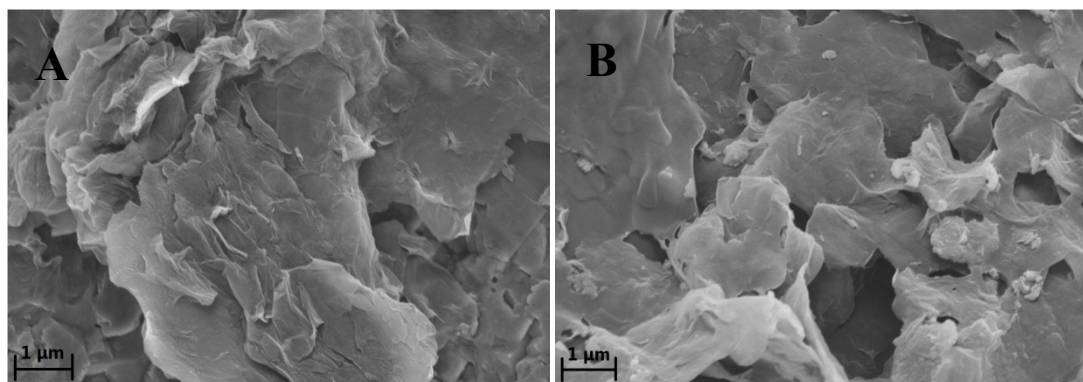

Fig.S4 The microstructure of (A) 3-cF<sub>3</sub>poPcCo/rGO and (B) 4-cF<sub>3</sub>poPcCo/rGO hybrid.

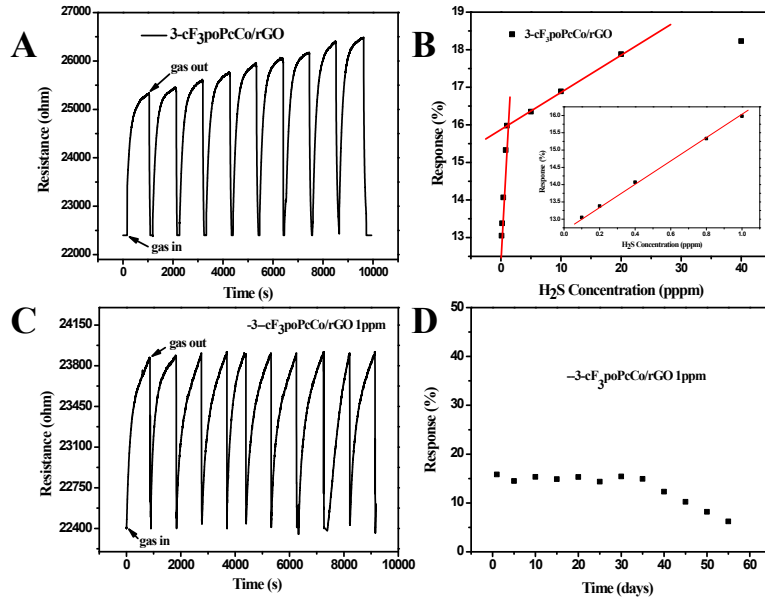

Fig.S5 (A) Resistance of the 3-cF<sub>3</sub>poPcCo/rGO hybrid sensor upon exposure to varying concentrations of H<sub>2</sub>S; (B) relationship of the response of the 3-cF<sub>3</sub>poPcCo/rGO hybrid sensor to the concentration H<sub>2</sub>S; (C) ten sensing cycles of the 3-cF<sub>3</sub>poPcCo/rGO hybrid sensor to 1 ppm H<sub>2</sub>S; (D) the reproducibility characteristics of the 3-cF<sub>3</sub>poPcCo/rGO hybrid sensor to 1 ppm H<sub>2</sub>S within 60 days at 25 °C.

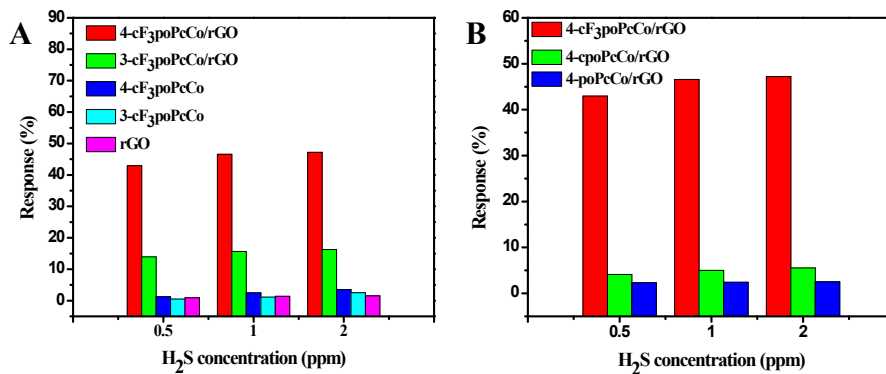

Fig.S6 (A) Response of 4-cF<sub>3</sub>poPcCo/rGO, 3-cF<sub>3</sub>poPcCo/rGO, 4-cF<sub>3</sub>poPcCo, 3-cF<sub>3</sub>poPcCo and

rGO sensors upon varying the concentration of  $H_2S$ ; (B) Response of 4- $cF_3poPcCo/rGO$ , 4- $cpoPcCo$ , 4- $poPcCo$  sensors upon varying the concentration of  $H_2S$ .

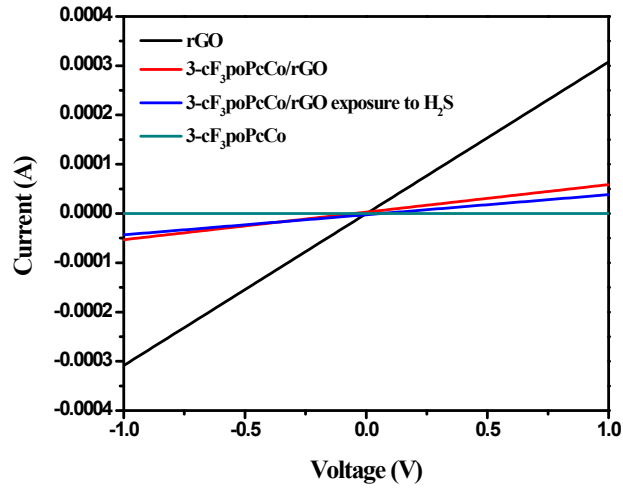

Fig.S7 I-V curves of the rGO, 3- $cF_3poPcCo$ , 3- $cF_3poPcCo/rGO$  and 3- $cF_3poPcCo/rGO$  exposure to  $H_2S$ .

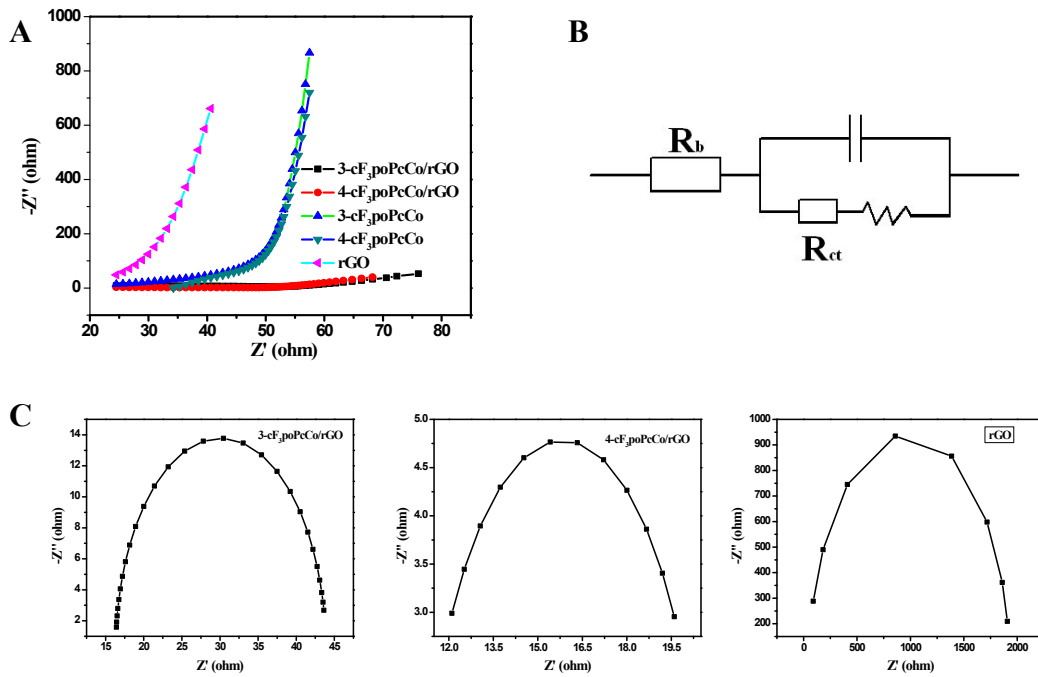

Fig.S8 (A) Nyquist plots of rGO,  $cF_3poPcCo$ ,  $cF_3poPcCo/rGO$  hybrids and (B) Equivalent circuit diagram; (C) Fitted chemical impedance Nyquist plots of rGO and  $cF_3poPcCo/rGO$  hybrids.



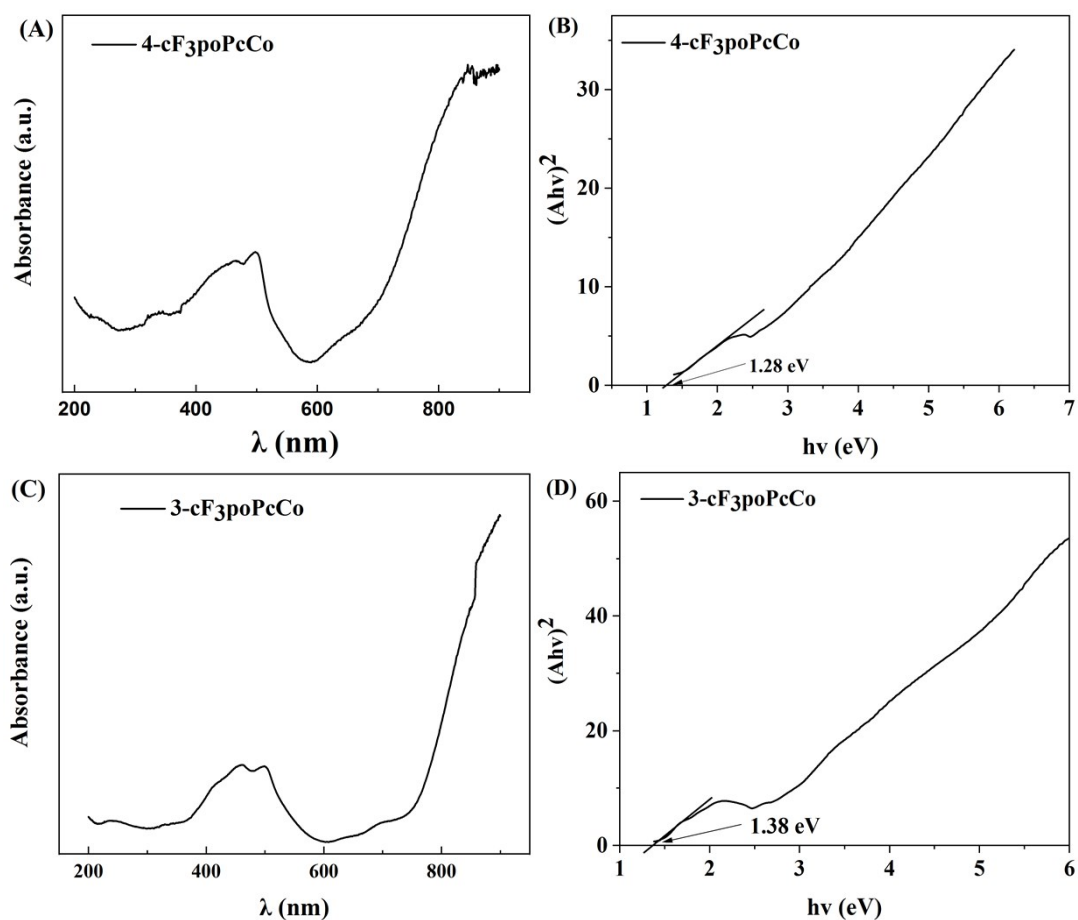

Fig. S8. UV-vis absorption spectra (A,C) and band gap energies (B,D) of 4-cF<sub>3</sub>poPcCo and 3-cF<sub>3</sub>poPcCo.

Table S1. Comparison of the detection performances of different H<sub>2</sub>S sensors

| Sensor material                | Response(%) / Detection conc. (ppm) <sup>[b]</sup> | Detection limit (ppm) <sup>[a]</sup> | Working temperature (°C) <sup>[c]</sup> | Recovery                                        |                       | Ref. |
|--------------------------------|----------------------------------------------------|--------------------------------------|-----------------------------------------|-------------------------------------------------|-----------------------|------|
|                                |                                                    |                                      |                                         | time (s) / Detection conc. (ppm) <sup>[b]</sup> | Detection range (ppm) |      |
| net-like SnO <sub>2</sub> /ZnO | 112/5                                              | 0.01                                 | 100                                     | 513/5                                           | 0.5-10                | 1    |
| In <sub>2</sub> O <sub>3</sub> | 1.4/10                                             | 0.2                                  | RT                                      | ~7200/100                                       | 10-80                 | 2    |
| CuO-Decorated ZnO              | 83.5/5                                             | 0.015                                | 200                                     | 65/5                                            | 5-100                 | 3    |
| Cu/SWCNTs                      | 1.3/20                                             | —                                    | RT                                      | 20/20                                           | 5-150                 | 4    |

|                                                     |                                               |        |     |          |               |                                  |
|-----------------------------------------------------|-----------------------------------------------|--------|-----|----------|---------------|----------------------------------|
| PPy/WO <sub>3</sub>                                 | 5.3/1                                         | —      | RT  | 12600/1  | 0.1-1         | 5                                |
| Co<br>phthalocyanine-<br>Au                         | 5.2/10                                        | 0.1    | RT  | 960/10   | 0.1-50        | 6                                |
| SnO <sub>2</sub> multitube<br>arrays                | 1.5/5                                         | —      | RT  | 30/5     | 5-100         | 7                                |
| SnO <sub>2</sub> -CNT                               | 4/50                                          | ~9     | RT  | ~60/50   | ~50-<br>~200  | 8                                |
| quasi-2D<br>CuO/SnO <sub>2</sub>                    | 1.8/50                                        | 0.5    | RT  | 500/50   | 0.5-100       | 9                                |
| Cu <sub>2</sub> O-FGS                               | 1.4/0.1                                       | 0.005  | RT  | —        | 0.005-<br>0.1 | 10                               |
| SnO <sub>2</sub><br>nanowire/rGO                    | 33/50                                         | 0.043  | RT  | 292/50   | 10-100        | 11                               |
| Au/Fe <sub>2</sub> O <sub>3</sub>                   | 6.38/10                                       | 1      | 250 | 1620/10  | 1-50          | 12                               |
| p-type Co <sub>3</sub> O <sub>4</sub>               | 4.5/100                                       | 0.3    | 300 | 24/100   | 1-100         | 13                               |
| SnO <sub>2</sub> -rGO                               | 34.31/100                                     | 0.042  | 125 | 900/100  | 1-100         | 14                               |
| CuO                                                 | 1.25/0.01                                     | —      | RT  | 76/0.01  | 0.01-60       | 15                               |
| TiO <sub>2</sub> / α-Fe <sub>2</sub> O <sub>3</sub> | 7.4/200                                       | —      | 300 | 180/200  | 1-200         | 16                               |
| AlGaIn/GaN                                          | 112/90                                        | —      | 250 | 507/90   | 15-90         | 17                               |
| α-Fe <sub>2</sub> O <sub>3</sub>                    | 5.8/5                                         | —      | 135 | 45/5     | 1-50          | 18                               |
| SnO <sub>2</sub> -CuWO <sub>4</sub>                 | 2 × 10 <sup>6</sup> (sensor<br>signal)<br>/20 | —      | 100 | 438/20   | 5-30          | 19                               |
| SnO <sub>2</sub> -CuO                               | 38/100                                        | —      | 100 | Long/120 | 0.1-30        | 20                               |
| 3-<br>cF <sub>3</sub> poPcCo/rG<br>O                | 15.63/1                                       | 0.023  | RT  | 120/1    | 0.1-40        | This<br>work <sup>[<br/>d]</sup> |
| 4-<br>cF <sub>3</sub> poPcCo/rG<br>O                | 46.58/1                                       | 0.0116 | RT  | 50/1     | 0.1-40        |                                  |

[a] If the sensor detection limit was not explicitly provided in the original report, then the lowest tested analyte concentration is listed.

[b] If the response (%), response time (s) or recovery time (s) of the sensor was not explicitly provided in the original report, then the estimate from the curve in that report is listed.

[c] RT, abbreviation for room temperature.

[d] sensor prepared with the cF<sub>3</sub>poPcCo/rGO aqueous dispersion concentrations of 1.0 mg ml<sup>-1</sup>.

- [1]D. Y. Fu, C. L. Zhu, X. T. Zhang, C. Y. Li, Y. J. Chen, Two dimensional net-like SnO<sub>2</sub>/ZnO heteronanostructures for highperformance H<sub>2</sub>S gas sensor. *J. Mater. Chem. A* 2016, 4, 1390.
- [2]M. Kaur, N. Jain, K. Sharma, S. Bhattacharya, M. Roy, A.K. Tyagi, S.K. Gupta, J.V. Yakhmi, Room-temperature H<sub>2</sub>S gas sensing at ppb level by single crystal In<sub>2</sub>O<sub>3</sub> whiskers. *Sens. Actuators, B* 2008,133, 456–461.
- [3]N.M. Vuong, N.D. Chinh, B.T Huy, Y. Lee CuO-Decorated ZnO Hierarchical Nanostructures as Efficient and Established Sensing Materials for H<sub>2</sub>S Gas Sensors, *Sci.Rep.*6:26736.
- [4]M. Asad, M.H. Sheikhi, M. Pourfath, M. Moradi, High sensitive and selective flexible H<sub>2</sub>S gas sensors based on Cu nanoparticle decorated SWCNTs, *Sens. Actuators, B* 2015, 210, 1–8.
- [5]P.G.Su, Y.T. Peng, Fabrication of a room-temperature H<sub>2</sub>S gas sensor based on PPy/WO<sub>3</sub> nanocomposite films by in-situ photopolymerization, *Sens. Actuators, B* 2014, 193, 637–643.
- [6]A. Kumar, N. Joshi, S. Samanta, A. Singh, A.K. Debnath, A.K. Chauhan, M. Roy, R. Prasad, K. Roy, M.M. Chehimi, D.K. Aswal, S.K. Gupta, Room temperature detection of H<sub>2</sub>S by flexible gold–cobalt phthalocyanine heterojunction thin films, *Sens. Actuators, B* 2015, 206, 653–662.
- [7]J. Tian, F. Pan, R. Xue, W. Zhang, X. Fang, Q. Liu, Y. Wang, Z. Zhang, D. Zhang, A highly sensitive room temperature H<sub>2</sub>S gas sensor based on SnO<sub>2</sub> multi-tube arrays bio-templated from insect bristles, *Dalton Trans.* 2015, 44, 7911–7916.
- [8]F. Mendoza, D.M. Hernández, V. Makarov, E. Febus, B.R. Weiner, G. Morell, Room temperature gas sensor based on tin dioxide–carbon nanotubes composite films. *Sens. Actuators, B* 2014,190, 227–233.
- [9]G. Cui, M. Zhang, G. Zou, Resonant tunneling modulation in quasi-2D Cu<sub>2</sub>O/SnO<sub>2</sub> p–n horizontal-multi-layer heterostructure for room temperature H<sub>2</sub>S sensor application. *Sci.Rep.* 2013, 3, 1250.
- [10]L. Zhou, F. Shen, X. Tian, D. Wang, T. Zhang, W. Chen, Stable Cu<sub>2</sub>O nanocrystals grown on functionalized graphene sheets and room temperature H<sub>2</sub>S gas sensing with ultrahigh sensitivity, *Nanoscale* 2013, 5, 1564–1569.
- [11]Z.L. Song, Z.R. Wei, B.C. Wang, Z. Luo, S.M. Xu, W.K. Zhang, H.X. Yu, M. Li, Z. Huang, J.F. Zang, F. Yi, H. Liu, Sensitive Room-Temperature H<sub>2</sub>S Gas Sensors Employing SnO<sub>2</sub> Quantum Wire/Reduced Graphene Oxide Nanocomposites, *Chem. Mater.* 2016, 28, 1205–1212.

- [12]V. Balouria, N.S. Ramgir, A. Singh, A.K. Debnath, A. Mahajan, R.K. Bedi, D.K. Aswal, S.K. Gupta, Enhanced H<sub>2</sub>S sensing characteristics of Au modified Fe<sub>2</sub>O<sub>3</sub> thin films, *Sens. Actuators B* 2015, 219, 125–132.
- [13]P.L. Quang, N.D. Cuong, T.T. Hoa, H.T. Long, C.M. Hung, D.T.T. Le, N.V. Hieu, Simple post-synthesis of mesoporous p-type Co<sub>3</sub>O<sub>4</sub> nanochains for enhanced H<sub>2</sub>S gas sensing performance, *Sens. Actuators B* 2018, 270, 158–166.
- [14]J. Chu, X. Wang, D. Wang, A. Yang, P. Lv, Y. Wu, M. Rong, L. Gao, Highly selective detection of sulfur hexafluoride decomposition components H<sub>2</sub>S and SOF<sub>2</sub> employing sensors based on tin oxide modified reduced graphene oxide *Carbon* 2018, 135, 95–103.
- [15]Z. Li, N. Wang, Z. Lin, J. Wang, W. Liu, K. Sun, Y.Q. Fu, Z. Wang, Room-Temperature High-Performance H<sub>2</sub>S Sensor Based on Porous CuO Nanosheets Prepared by Hydrothermal Method, *ACS Appl. Mater. Interfaces* 2016, 8, 20962–20968.
- [16]H. Kheel, G.J. Sun, J.K. Lee, S. Lee, R.P. Dwivedi, C. Lee, Enhanced H<sub>2</sub>S sensing performance of TiO<sub>2</sub>-decorated  $\alpha$ -Fe<sub>2</sub>O<sub>3</sub> nanorod sensors, *Ceram. Int.* 2016, 42, 18597–18604.
- [17]R. Sokolovskij, J. Zhangb, E. Iervolino, C. Zhao, F. Santagata, F. Wang, H. Yu, P.M. Sarro, G.Q. Zhang, Hydrogen sulfide detection properties of Pt-gated AlGaIn/GaN HEMT-sensor, *Sens. Actuators B* 2018, 274, 636–644.
- [18]D. Li, L. Qin, P. Zhao, Y. Zhang, D. Liu, F. Liu, B. Kang, Y. Wang, W.H. Song, T. Zhang, G.Y. Lu, Preparation and gas-sensing performances of ZnO/CuO rough nanotubular arrays for low-working temperature H<sub>2</sub>S detection. *Sens. Actuators B* 2018, 254, 834–841.
- [19]A. Stanoiu, C.E. Simion, J.M. Calderon-Moreno, P. Osiceanu, M. Florea, V.S. Teodorescu, S. Somacescu, Sensors based on mesoporous SnO<sub>2</sub>-CuWO<sub>4</sub> with high selective sensitivity to H<sub>2</sub>S at low operating temperature, *J. Hazard. Mater.* 2017, 331, 150–160.
- [20]C. Gao, Z.D. Lin, N. Li, P. Fu, X.H. Wang, Preparation and H<sub>2</sub>S Gas-Sensing Performances of Coral Like SnO<sub>2</sub>-CuO Nanocomposite, *Acta Metall. Sin. (Engl. Lett.)* 2015, 28, 1190–1197.
